# Supplementary material for: Oversized composite braided biodegradable stents with post-dilatation for pediatric applications: mid-term results of a porcine study
Source: Royal Society of Chemistry journal article supplement (doi:10.1039/d0bm00567c), 2020-01-01
Supplement: d0bm00567c2.pdf [file d0bm00567c2.pdf]

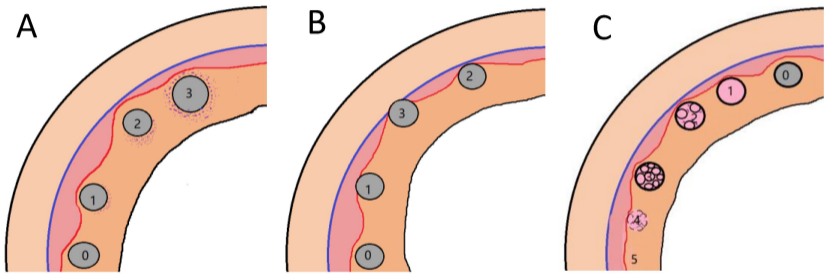

- |                                                                                                           |                                                                                                            |
|-----------------------------------------------------------------------------------------------------------|------------------------------------------------------------------------------------------------------------|
|  Neointima               |  Stent Strut              |
|  Tunica media            |  Dyes for HE staining     |
|  Tunica adventitia       |                                                                                                            |
|  External elastic lamina |  Internal elastic lamina |
