# Supplementary figures and images for: Oversized composite braided biodegradable stents with post-dilatation for pediatric applications: mid-term results of a porcine study
Source: Royal Society of Chemistry journal article supplement (doi:10.1039/d0bm00567c), 2020-01-01

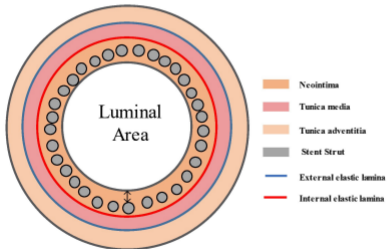

Supplement: d0bm00567c1.pdf [file d0bm00567c1.pdf]

**A**

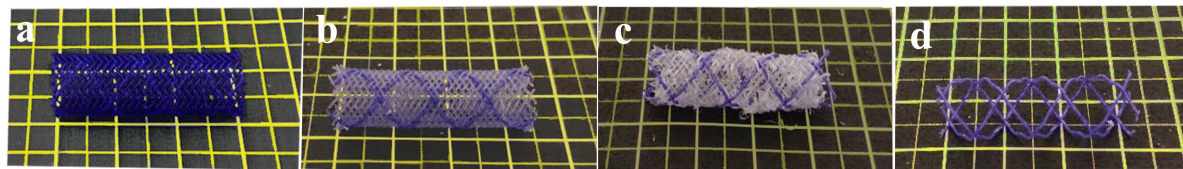

**B**

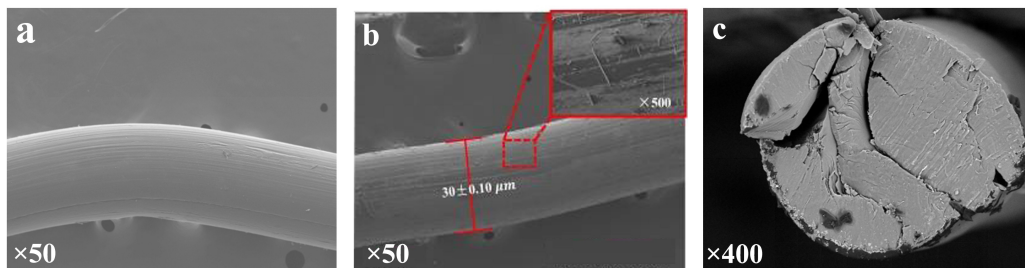

**C**

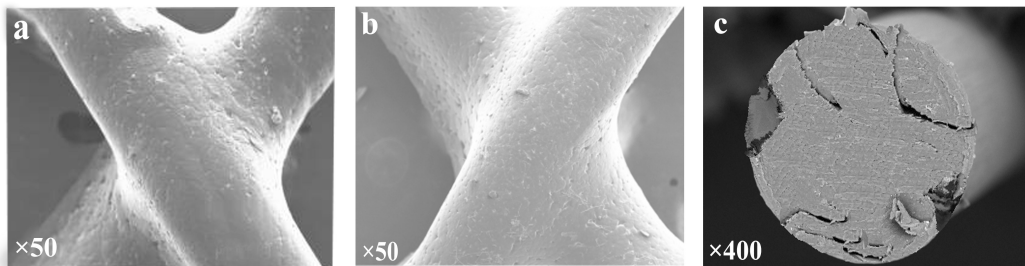

Supplement: d0bm00567c3.pdf [file d0bm00567c3.pdf]
